# Supplementary material for: Development of Genetic Modification Tools for Hanseniaspora uvarum
Source: MDPI journal article supplement (doi:10.3390/ijms22041943), 2021-02-16
Supplement: s1 [file s1]

Supplementary

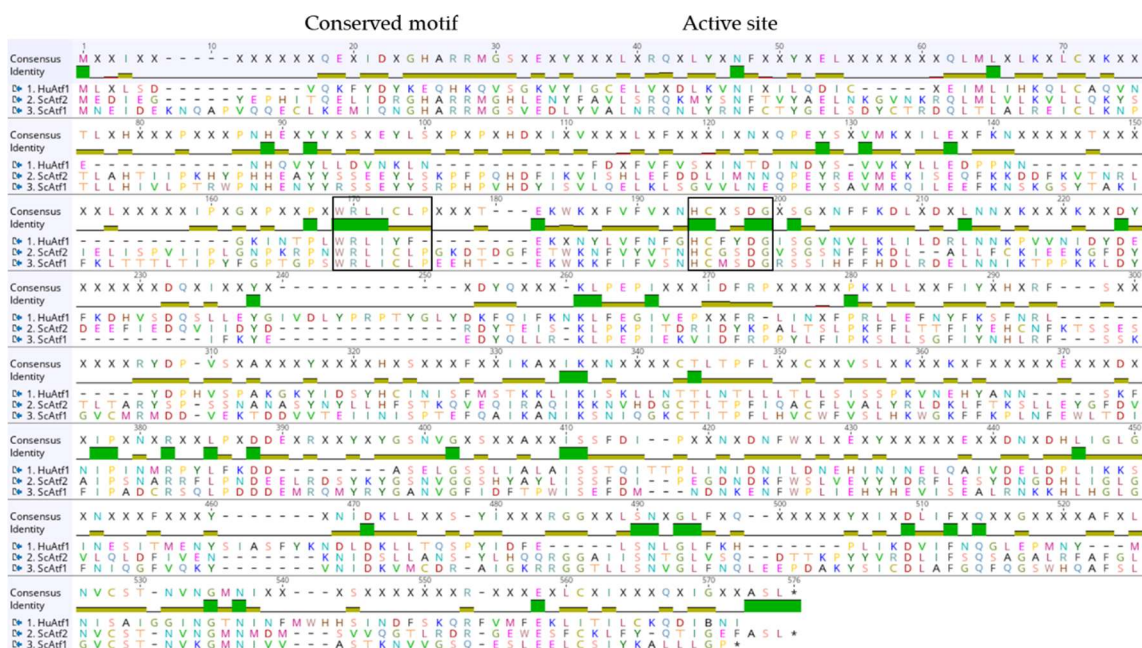

**Figure S1.** Alignment of the amino acid sequence HuAtf1 with the two Atfs of *Saccharomyces cerevisiae*. The conserved WRLICLP motif as well as the HXXXDG active site are shown in boxes.

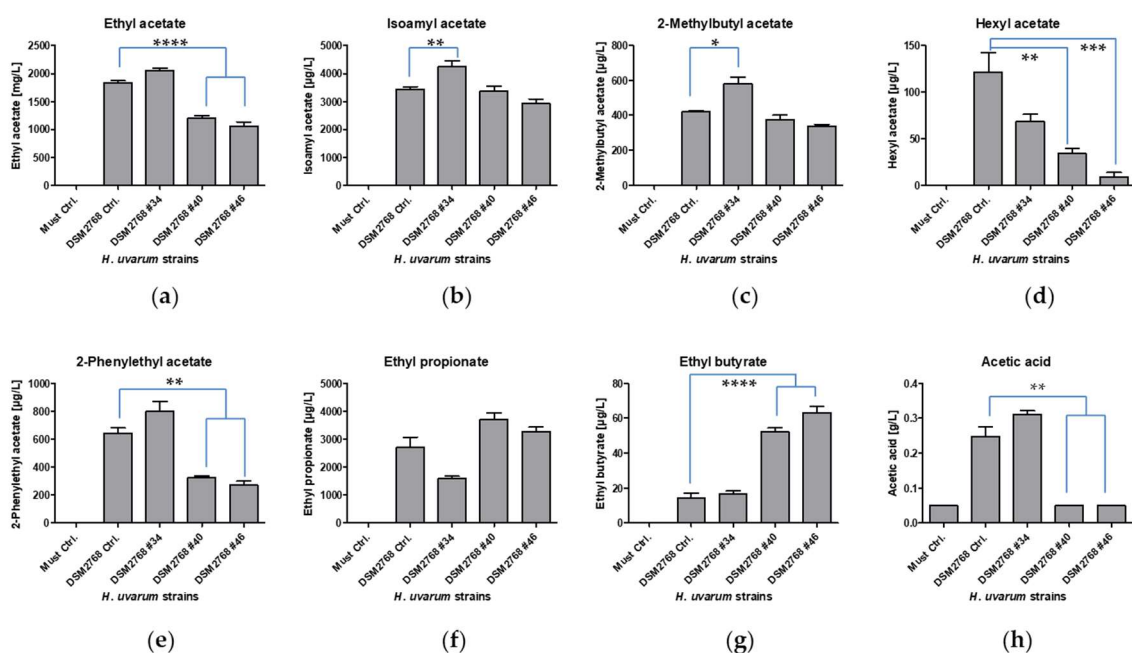

**Figure S2.** Acetate esters, ethyl esters and acetic acid produced after three days of fermentation of Müller-Thurgau must with *Hanseniaspora uvarum* DSM2768 for comparison (DSM2768 Ctrl.); DSM2768 #34 (WT/ $\Delta$ ); DSM2768 #40 ( $\Delta/\Delta$ ) and DSM2768 #46 ( $\Delta/\Delta$ ). Pure must without the addition of yeasts served as a negative control (Must Ctrl.). The measured acetate esters are: (a) ethyl acetate [mg/L]; (b) isoamyl acetate [ $\mu$ g/L]; (c) 2-methylbutyl acetate [ $\mu$ g/L]; (d) hexyl acetate [ $\mu$ g/L]; (e) 2-phenylethyl acetate [ $\mu$ g/L]; (f) ethyl propionate [ $\mu$ g/L], (g) ethyl butyrate [ $\mu$ g/L] and (h) acetic acid [g/L]. Acetate ester production was measured via HS-SPME-GC-MS analysis. Data are the mean of three independent experiments  $\pm$  SEM, 1-way ANOVA, Bonferroni's multiple comparison test, \* $p < 0.05$ , \*\* $p < 0.01$ , \*\*\* $p < 0.001$ , \*\*\*\* $p < 0.0001$ . Error bar indicate the standard deviation.

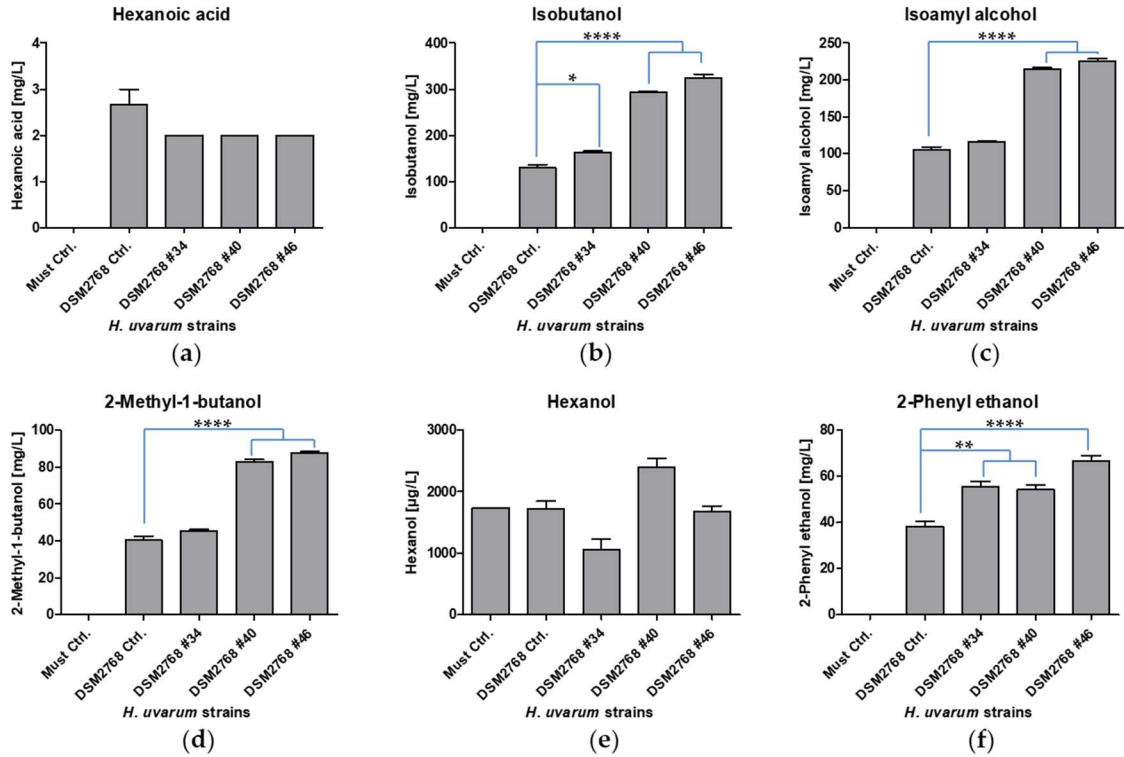

**Figure S3.** Amounts of fatty acid and alcohols detected after three days of fermentation of Müller-Thurgau must with *Hanseniaspora uvarum* DSM2768 for comparison (DSM2768 Ctrl.); DSM2768 #34 (WT/ $\Delta$ ); DSM2768 #40 ( $\Delta/\Delta$ ) and DSM2768 #46 ( $\Delta/\Delta$ ). Pure must without the addition of yeasts served as a negative control (Must Ctrl.). The measured fatty acid and alcohols are: (a) hexanoic acid [mg/L]; (b) isobutanol [mg/L]; (c) isoamyl alcohol [mg/L]; (d) 2-methyl-1-butanol [mg/L]; (e) hexanol [ $\mu$ g/L] and (f) 2-phenyl ethanol [mg/L]. The amounts of fatty acid and alcohols were measured via HS-SPME-GC-MS analysis. Data are the mean of three independent experiments  $\pm$  SEM, 1-way ANOVA, Bonferroni's multiple comparison test, \* $p < 0.05$ , \*\* $p < 0.01$ , \*\*\* $p < 0.0001$ . Error bar indicate the standard deviation.
